# Supplementary material for: Tantallacyclopentadiene as a unique metal-containing diene ligand coordinated to nickel for preparing tantalum–nickel heterobimetallic complexes
Source: Royal Society of Chemistry journal article supplement (doi:10.1039/c7dt02481a), 2017-01-01
Supplement: c7dt02481a1.pdf [file c7dt02481a1.pdf]

## Supporting Information

for

### Tantallacyclopentadiene as a Unique Metal-containing Diene Ligand Coordinated to Nickel for Preparing Tantalum—Nickel Heterobimetallic Complexes

Payel Laskar, Keishi Yamamoto, Anga Srinivas, Alexis Mifleur, Haruki Nagae,  
Hayato Tsurugi,\* and Kazushi Mashima\*

Department of Chemistry, Graduate School of Engineering Science, Osaka University,  
Toyonaka, Osaka 560-8531, Japan

#### Contents:

1. NMR spectra of  $\text{TaCl}_3(\text{C}_4\text{H}_2^t\text{Bu}_2)\text{Ni}(\text{COD})$  (4).
2. NMR spectra of  $\text{TaCl}_3(\text{C}_4\text{H}_2^t\text{Bu}_2)\text{Ni}(\text{PMe}_2\text{Ph})_2$  (5).
3. NMR spectra of  $\text{TaCl}_3(\text{C}_4\text{H}_2^t\text{Bu}_2)\text{Ni}(\text{DPPE})$  (6a).
4. NMR spectra of  $\text{TaCl}_3(\text{C}_4\text{H}_2^t\text{Bu}_2)\text{Ni}(\text{DEPE})$  (6b).
5. NMR spectra of  $\text{TaCl}_3(\text{C}_4\text{H}_2^t\text{Bu}_2)\text{Ni}(\text{IPr})$  (7).
6. Crystal data and data collection parameters of complexes 4, 6a and 7.
7. Single-point DFT Calculation (B3LYP/LANL2DZ, 6-311G(d)) for IPr-coordinated Ta-Ni complex 7.

1. NMR spectra of  $\text{TaCl}_3(\text{C}_4\text{H}_2^t\text{Bu}_2)\text{Ni}(\text{COD})$  (**4**).

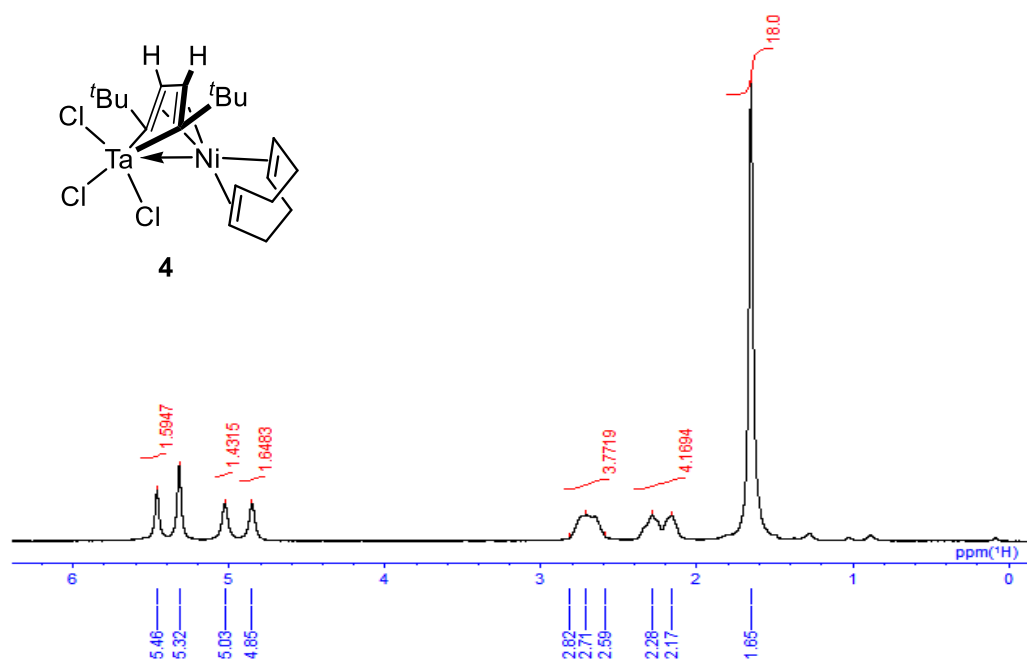

Figure S1.  $^1\text{H}$  NMR spectrum of **4** in  $\text{CD}_2\text{Cl}_2$  at 30 °C.

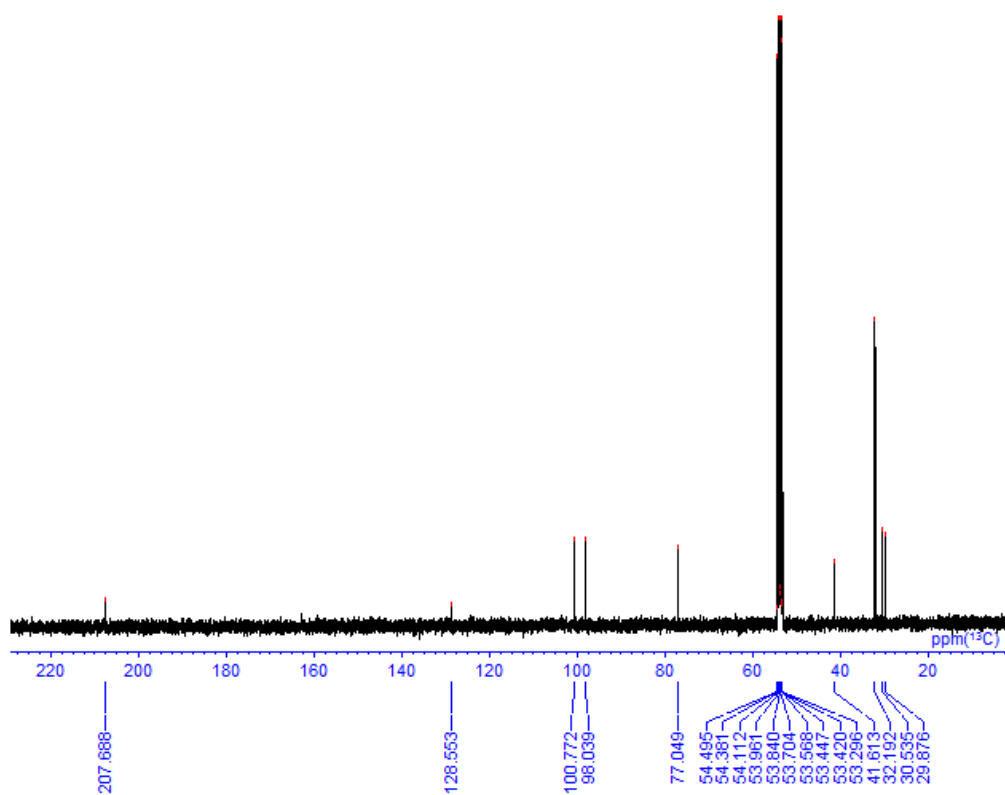

Figure S2.  $^{13}\text{C}$  NMR spectrum of **4** in  $\text{CD}_2\text{Cl}_2$  at 30 °C.

2. NMR spectra of  $\text{TaCl}_3(\text{C}_4\text{H}_2^t\text{Bu}_2)\text{Ni}(\text{PMe}_2\text{Ph})_2$  (**5**).

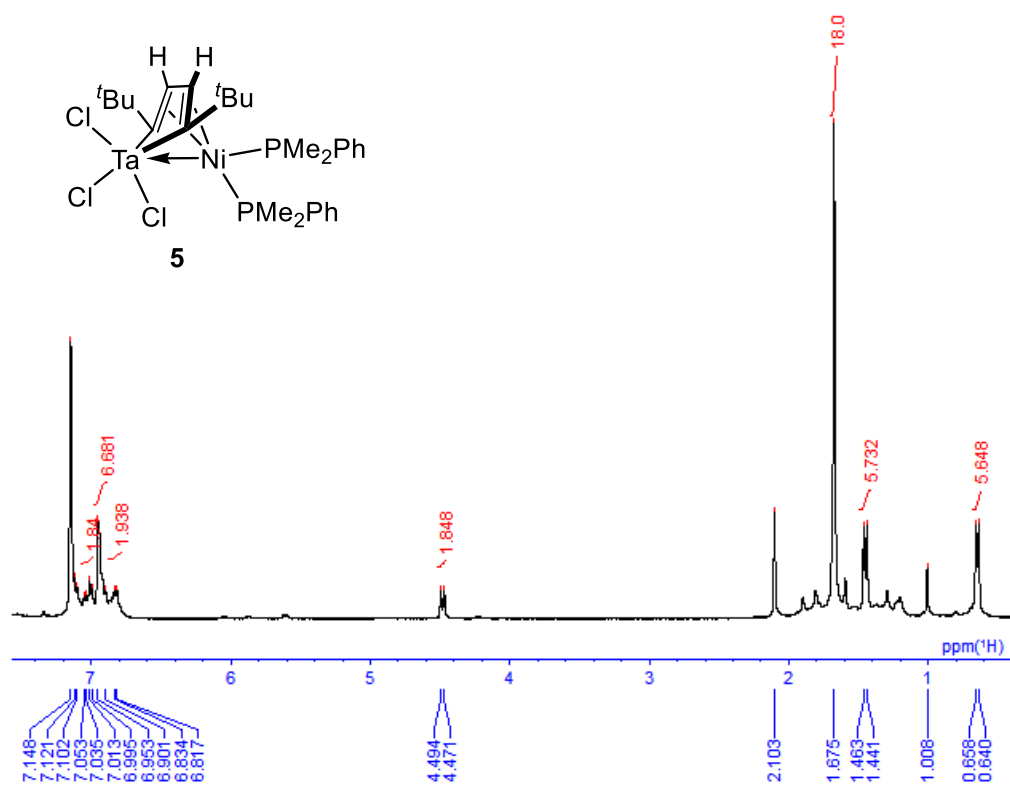

Figure S3. <sup>1</sup>H NMR spectrum of **5** in C<sub>6</sub>D<sub>6</sub> at 30 °C.

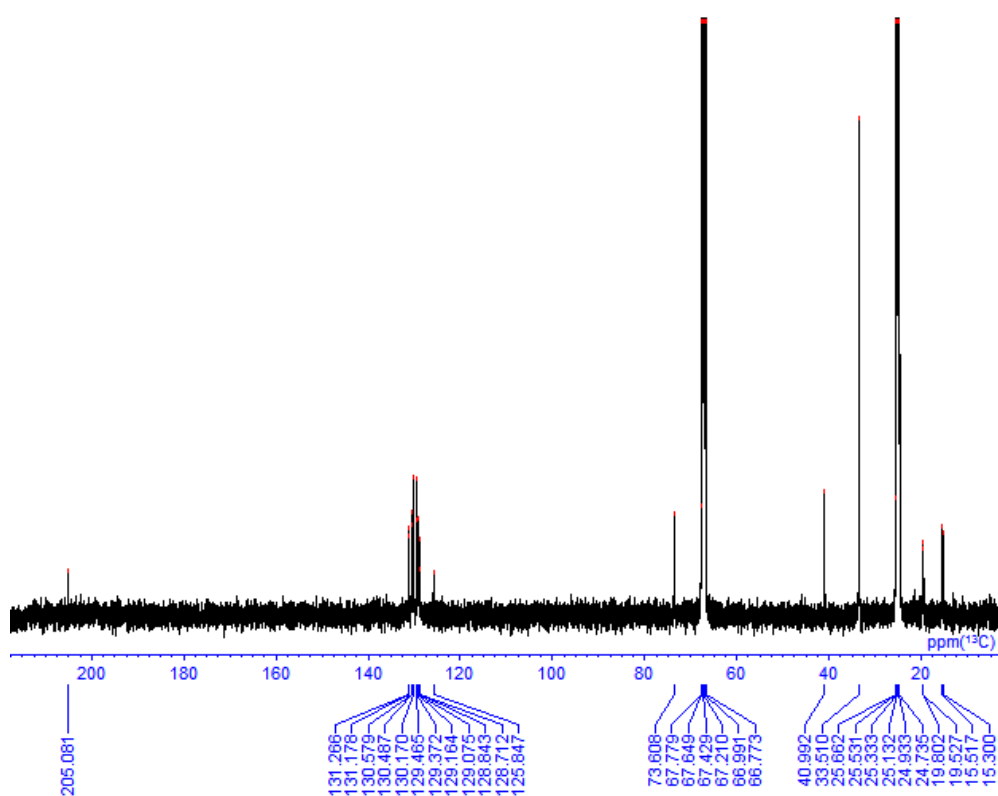

Figure S4. <sup>13</sup>C NMR spectrum of **5** in THF-*d*<sub>8</sub> at 30 °C.

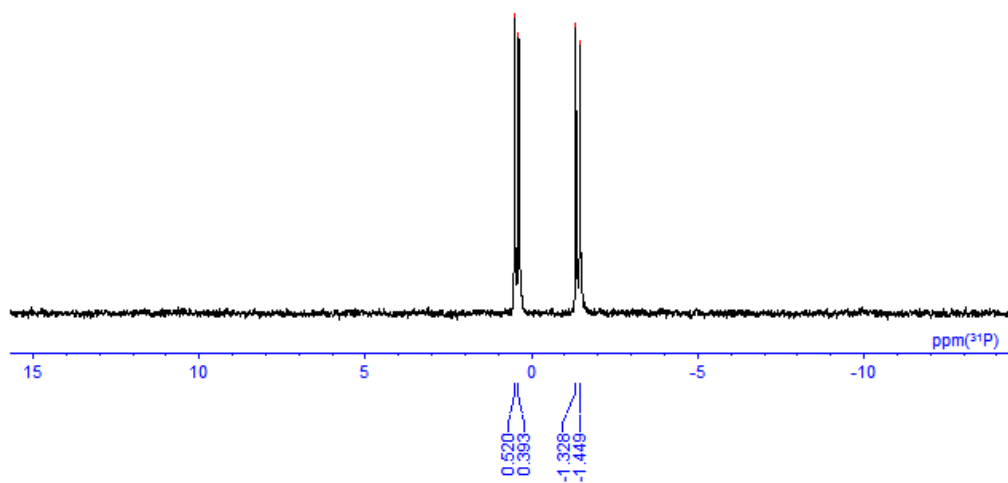

**Figure S5.**  $^{31}\text{P}$  NMR Spectrum of **5** in  $\text{THF-}d_8$  at 30 °C.

3. NMR spectra of TaCl<sub>3</sub>(C<sub>4</sub>H<sub>2</sub><sup>t</sup>Bu<sub>2</sub>)Ni(DPPE) (**6a**).

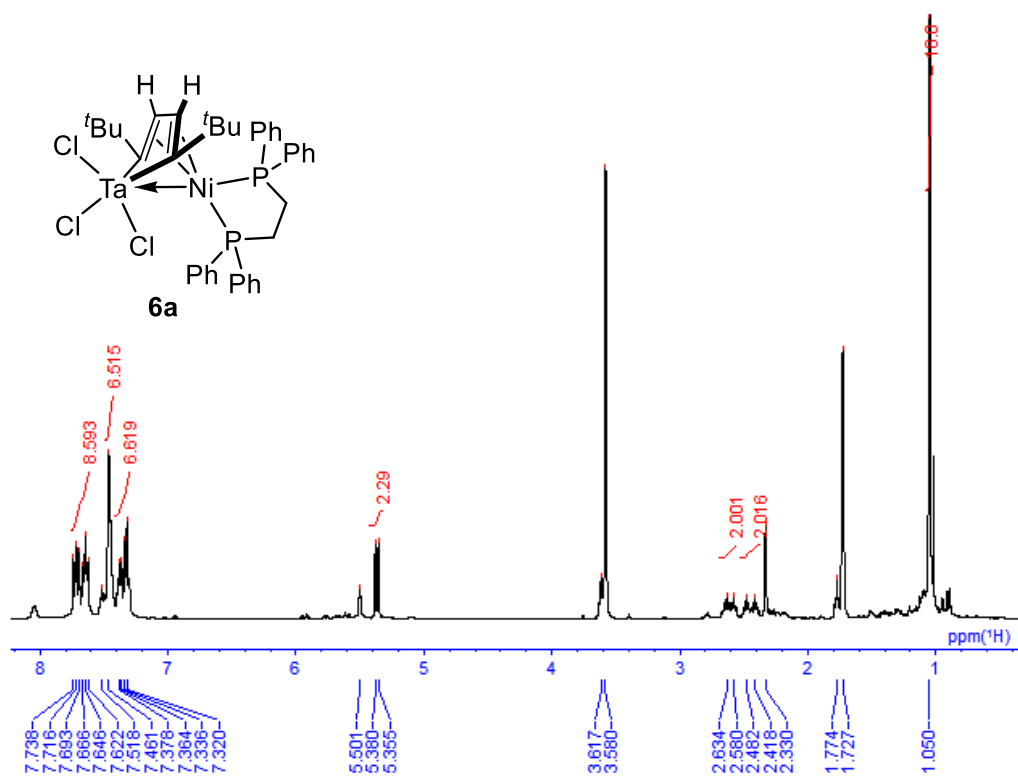

Figure S6. <sup>1</sup>H NMR Spectrum of **6a** in THF-*d*<sub>8</sub> at 30 °C.

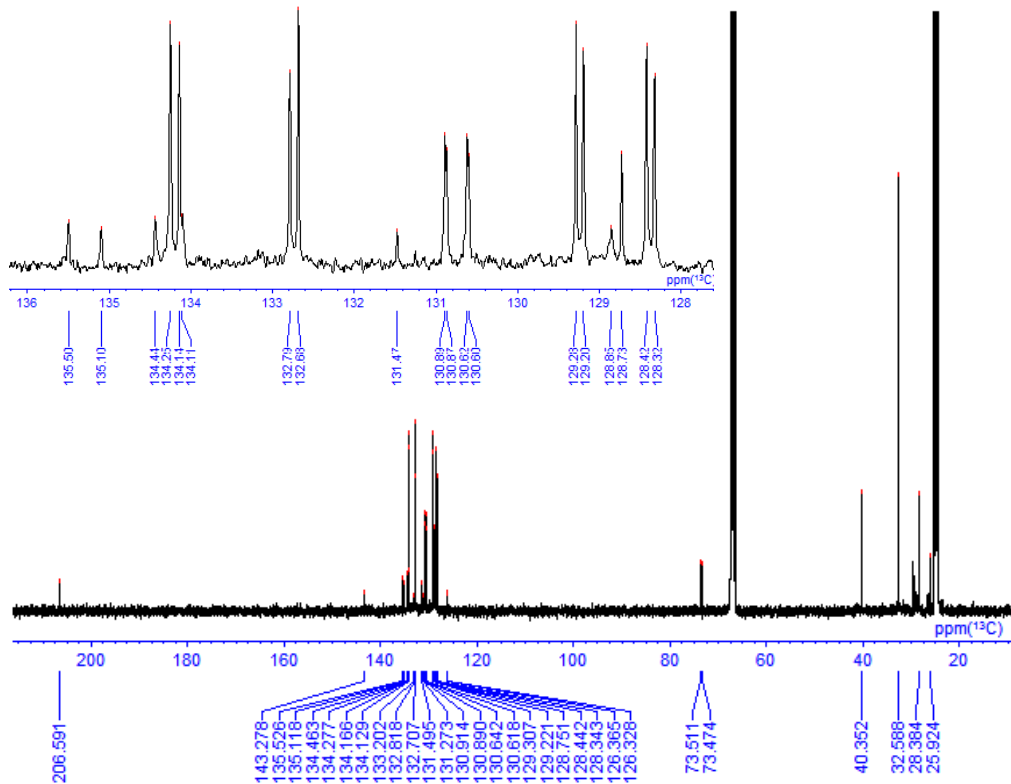

Figure S7. <sup>13</sup>C NMR Spectrum of **6a** in THF-*d*<sub>8</sub> at 30 °C.

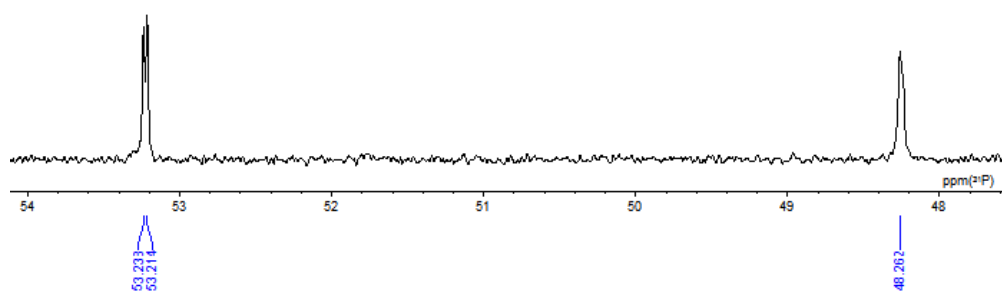

**Figure S8.**  $^{31}\text{P}$  NMR Spectrum of **6a** in  $\text{THF-}d_8$  at 30 °C.

#### 4. NMR spectra of TaCl<sub>3</sub>(C<sub>4</sub>H<sub>2</sub><sup>t</sup>Bu<sub>2</sub>)Ni(DEPE) (**6b**).

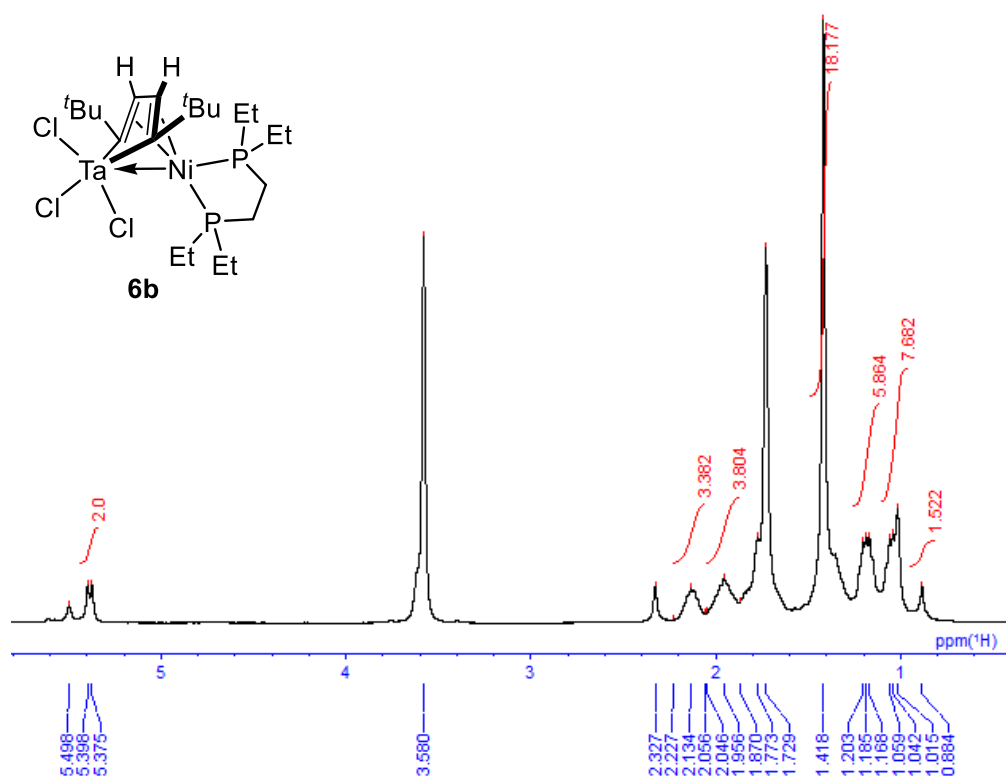

Figure S9. <sup>1</sup>H NMR Spectrum of **6b** in THF-*d*<sub>8</sub> at 30 °C.

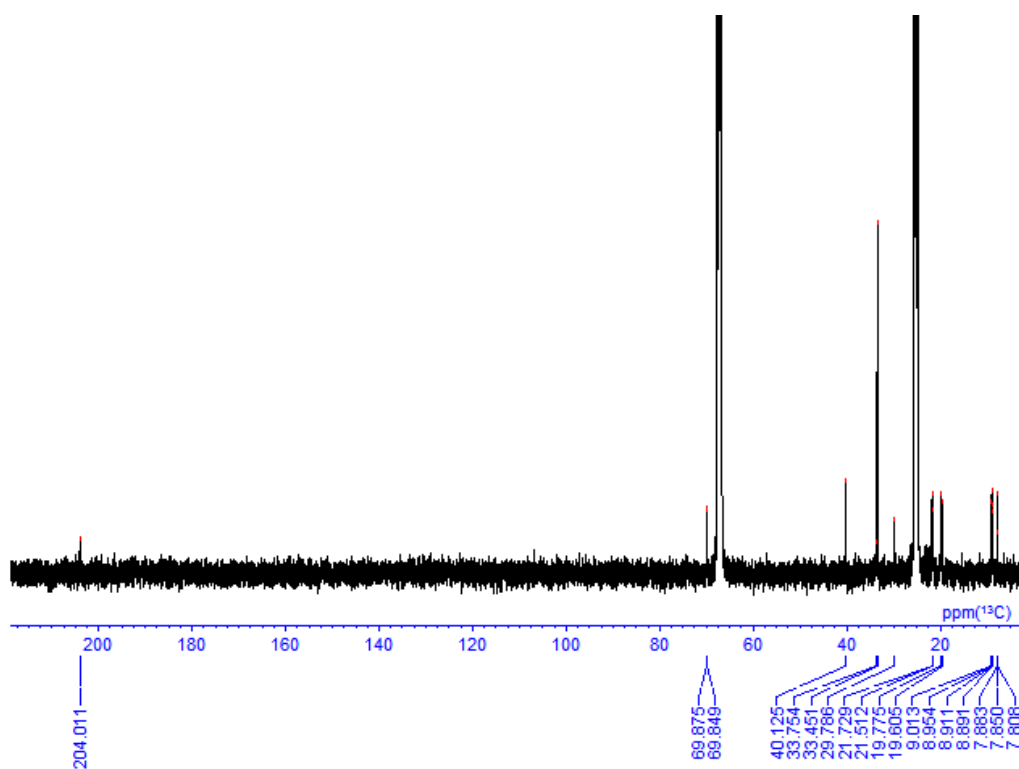

Figure S10. <sup>13</sup>C NMR Spectrum of **6b** in THF-*d*<sub>8</sub> at 30 °C.

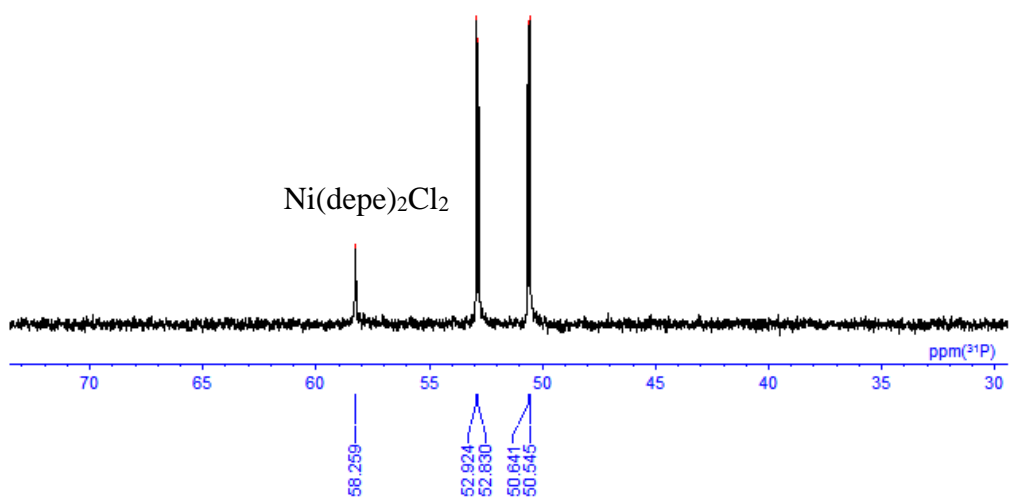

**Figure S11.**  $^{31}\text{P}$  NMR Spectrum of **6b** in  $\text{THF-}d_8$  at  $30\text{ }^\circ\text{C}$ .





## 6. Crystal data and data collection parameters.

**Table S1.** Crystal data and data collection parameters of **4**, **6a**, and **7**.

|                                                     | <b>4</b>                                             | <b>6a</b>                                                                                                      |
|-----------------------------------------------------|------------------------------------------------------|----------------------------------------------------------------------------------------------------------------|
| empirical formula                                   | C <sub>20</sub> H <sub>32</sub> Cl <sub>3</sub> NiTa | 2(C <sub>38</sub> H <sub>44</sub> Cl <sub>3</sub> NiP <sub>2</sub> Ta),<br>1.5(C <sub>6</sub> H <sub>6</sub> ) |
| formula Weight                                      | 618.48                                               | 1934.61                                                                                                        |
| crystal system                                      | monoclinic                                           | triclinic                                                                                                      |
| space group                                         | <i>P</i> 2 <sub>1</sub> / <i>n</i> (No. 14)          | <i>P</i> $\bar{1}$ (No. 2)                                                                                     |
| <i>a</i> , Å                                        | 9.680(3)                                             | 13.970(12)                                                                                                     |
| <i>b</i> , Å                                        | 16.427(5)                                            | 15.590(14)                                                                                                     |
| <i>c</i> , Å                                        | 14.080(5)                                            | 19.400(17)                                                                                                     |
| $\alpha$ , deg.                                     | -                                                    | 93.510(18)                                                                                                     |
| $\beta$ , deg.                                      | 104.420(3)                                           | 91.040(12)                                                                                                     |
| $\gamma$ , deg.                                     | -                                                    | 95.950(17)                                                                                                     |
| <i>V</i> , Å <sup>3</sup>                           | 2168.3(12)                                           | 4193(6)                                                                                                        |
| <i>Z</i>                                            | 4                                                    | 2                                                                                                              |
| <i>D</i> <sub>calcd</sub> , g/cm <sup>-3</sup>      | 1.894                                                | 1.532                                                                                                          |
| $\mu$ [Mo- <i>K</i> $\alpha$ ], mm <sup>-1</sup>    | 6.275                                                | 3.348                                                                                                          |
| <i>T</i> , K                                        | 113(2)                                               | 113(2)                                                                                                         |
| crystal size, mm                                    | 0.31 × 0.25 × 0.23                                   | 0.34 × 0.18 × 0.15                                                                                             |
| $\theta$ range for data collection (deg.)           | 3.18 to 27.46                                        | 3.02 to 27.42                                                                                                  |
| no. of reflections measured                         | 19778                                                | 36920                                                                                                          |
| unique data ( <i>R</i> <sub>int</sub> )             | 0.0437                                               | 0.0502                                                                                                         |
| data / restraints / parameters                      | 4750 / 0 / 226                                       | 16664 / 0 / 892                                                                                                |
| <i>R</i> 1 ( <i>I</i> > 2.0 $\sigma$ ( <i>I</i> ))  | 0.0430                                               | 0.0491                                                                                                         |
| <i>wR</i> 2 ( <i>I</i> > 2.0 $\sigma$ ( <i>I</i> )) | 0.1063                                               | 0.1082                                                                                                         |
| <i>R</i> 1(all data)                                | 0.0455                                               | 0.0638                                                                                                         |
| <i>wR</i> 2 (all data)                              | 0.1085                                               | 0.1217                                                                                                         |
| GOF on <i>F</i> <sup>2</sup>                        | 1.114                                                | 1.097                                                                                                          |
| $\Delta\rho$ , e Å <sup>-3</sup>                    | 3.25, -1.74                                          | 1.89, -1.86                                                                                                    |

a)  $R1 = (\sum||Fo| - |Fc|)| / (\sum|Fo|)$  b)  $wR2 = [\{\sum w(Fo^2 - Fc^2)^2\} / \{\sum w(Fo^4)\}]^{1/2}$

**Table S2.** (continued)

| 7                                              |                                                                                                          |
|------------------------------------------------|----------------------------------------------------------------------------------------------------------|
| empirical formula                              | C <sub>39</sub> H <sub>56</sub> Cl <sub>3</sub> N <sub>2</sub> NiTa, 1.5(C <sub>6</sub> H <sub>6</sub> ) |
| formula Weight                                 | 1016.01                                                                                                  |
| crystal system                                 | monoclinic                                                                                               |
| space group                                    | C2/c (No. 15)                                                                                            |
| <i>a</i> , Å                                   | 44.286(13)                                                                                               |
| <i>b</i> , Å                                   | 11.294(3)                                                                                                |
| <i>c</i> , Å                                   | 19.288(5)                                                                                                |
| <i>α</i> , deg.                                | -                                                                                                        |
| <i>β</i> , deg.                                | 105.361(4)                                                                                               |
| <i>γ</i> , deg.                                | -                                                                                                        |
| <i>V</i> , Å <sup>3</sup>                      | 9302(4)                                                                                                  |
| <i>Z</i>                                       | 8                                                                                                        |
| <i>D</i> <sub>calcd</sub> , g/cm <sup>-3</sup> | 1.431                                                                                                    |
| <i>μ</i> [Mo- <i>Kα</i> ], mm <sup>-1</sup>    | 2.957                                                                                                    |
| <i>T</i> , K                                   | 113(2)                                                                                                   |
| crystal size, mm                               | 0.31 × 0.13 × 0.13                                                                                       |
| <i>θ</i> range for data collection (deg.)      | 3.11 to 27.47                                                                                            |
| no. of reflections measured                    | 42870                                                                                                    |
| unique data ( <i>R</i> <sub>int</sub> )        | 0.0429                                                                                                   |
| data / restraints / parameters                 | 10175 / 0 / 496                                                                                          |
| <i>R</i> 1 ( <i>I</i> > 2.0σ( <i>I</i> ))      | 0.0423                                                                                                   |
| <i>wR</i> 2 ( <i>I</i> > 2.0σ( <i>I</i> ))     | 0.0941                                                                                                   |
| <i>R</i> 1(all data)                           | 0.0458                                                                                                   |
| <i>wR</i> 2 (all data)                         | 0.0969                                                                                                   |
| GOF on <i>F</i> <sup>2</sup>                   | 1.156                                                                                                    |
| Δρ, e Å <sup>-3</sup>                          | 2.87, -1.35                                                                                              |

a)  $R1 = (\sum ||Fo| - |Fc||) / (\sum |Fo|)$  b)  $wR2 = [ \{ \sum w(Fo^2 - Fc^2)^2 \} / \{ \sum w(Fo^4) \} ]^{1/2}$

## 7. Single-point DFT Calculation (B3LYP/LANL2DZ, 6-311G(d)) for IPr-coordinated Ta-Ni complex 7.

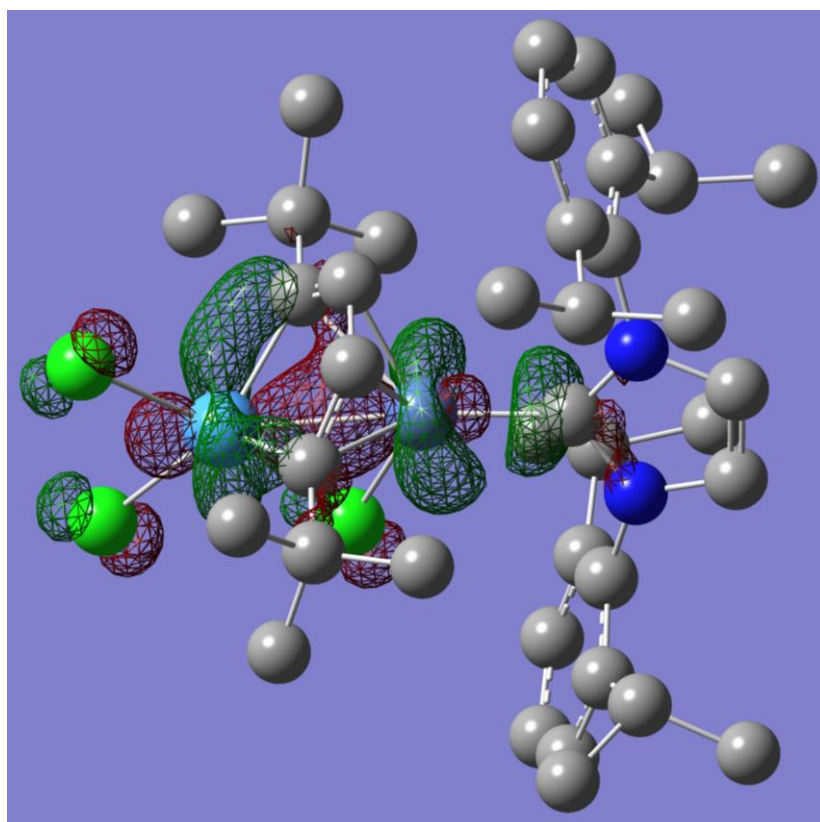

**Figure S14.** Molecular Orbital for HOMO-1 of complex 7.

**Table S3.** Cartesian coordinates for the structural calculation of complex 7.

| Center Number | Atomic Number | Atomic Type | Coordinates (Angstroms) |           |           |
|---------------|---------------|-------------|-------------------------|-----------|-----------|
|               |               |             | X                       | Y         | Z         |
| 1             | 73            | 0           | 2.737869                | -0.085703 | -0.149792 |
| 2             | 28            | 0           | 0.157498                | -0.004730 | -0.039269 |
| 3             | 17            | 0           | 4.451535                | -1.374406 | 0.863249  |
| 4             | 17            | 0           | 4.435363                | 1.186125  | -1.220977 |
| 5             | 17            | 0           | 1.253241                | 1.591222  | -1.240004 |
| 6             | 7             | 0           | -2.719348               | -0.659052 | 0.620528  |
| 7             | 7             | 0           | -2.476224               | 1.379840  | -0.022455 |
| 8             | 6             | 0           | 1.530144                | -1.564753 | -0.890824 |

|    |   |   |           |           |           |
|----|---|---|-----------|-----------|-----------|
| 9  | 6 | 0 | 0.872128  | -1.914180 | 0.300785  |
| 10 | 6 | 0 | 0.953911  | -1.083453 | 1.495828  |
| 11 | 6 | 0 | 1.646596  | 0.143190  | 1.560154  |
| 12 | 6 | 0 | 1.450015  | -2.308083 | -2.219107 |
| 13 | 6 | 0 | 2.813990  | -2.183307 | -2.914426 |
| 14 | 6 | 0 | 1.113233  | -3.790613 | -2.011243 |
| 15 | 6 | 0 | 0.386643  | -1.626137 | -3.090758 |
| 16 | 6 | 0 | 1.732065  | 1.011607  | 2.796380  |
| 17 | 6 | 0 | 0.350241  | 1.226120  | 3.432086  |
| 18 | 6 | 0 | 2.337640  | 2.356582  | 2.416277  |
| 19 | 6 | 0 | 2.646751  | 0.306366  | 3.813146  |
| 20 | 6 | 0 | -1.770902 | 0.210010  | 0.130510  |
| 21 | 6 | 0 | -3.949405 | -0.024704 | 0.809042  |
| 22 | 6 | 0 | -3.790118 | 1.242996  | 0.403996  |
| 23 | 6 | 0 | -2.525228 | -2.094485 | 0.730660  |
| 24 | 6 | 0 | -2.160252 | -2.650254 | 1.968411  |
| 25 | 6 | 0 | -1.877090 | -4.020784 | 1.991372  |
| 26 | 6 | 0 | -2.009660 | -4.794157 | 0.857353  |
| 27 | 6 | 0 | -2.469871 | -4.238133 | -0.333075 |
| 28 | 6 | 0 | -2.750441 | -2.872303 | -0.416626 |
| 29 | 6 | 0 | -2.121950 | -1.819765 | 3.239437  |
| 30 | 6 | 0 | -1.184346 | -2.387287 | 4.315348  |
| 31 | 6 | 0 | -3.540415 | -1.703851 | 3.848243  |
| 32 | 6 | 0 | -3.338798 | -2.290547 | -1.696510 |
| 33 | 6 | 0 | -2.982298 | -3.070948 | -2.965503 |
| 34 | 6 | 0 | -4.877374 | -2.206776 | -1.592575 |
| 35 | 6 | 0 | -1.955210 | 2.590128  | -0.615991 |
| 36 | 6 | 0 | -1.766858 | 3.719497  | 0.181946  |
| 37 | 6 | 0 | -1.180302 | 4.837449  | -0.429832 |
| 38 | 6 | 0 | -0.856181 | 4.840367  | -1.765995 |
| 39 | 6 | 0 | -1.142541 | 3.736123  | -2.545590 |
| 40 | 6 | 0 | -1.703991 | 2.586107  | -2.003111 |
| 41 | 6 | 0 | -2.211085 | 3.805863  | 1.630326  |
| 42 | 6 | 0 | -3.533735 | 4.593228  | 1.703791  |
| 43 | 6 | 0 | -1.178413 | 4.481873  | 2.540659  |

|    |   |   |           |           |           |
|----|---|---|-----------|-----------|-----------|
| 44 | 6 | 0 | -2.029296 | 1.384790  | -2.886310 |
| 45 | 6 | 0 | -1.304186 | 1.388760  | -4.231169 |
| 46 | 6 | 0 | -3.545850 | 1.284117  | -3.113055 |
| 47 | 1 | 0 | 2.786176  | -2.655778 | -3.773054 |
| 48 | 1 | 0 | 3.017249  | -1.237984 | -3.067335 |
| 49 | 1 | 0 | 3.506961  | -2.580008 | -2.346125 |
| 50 | 1 | 0 | 1.068565  | -4.239684 | -2.881291 |
| 51 | 1 | 0 | 1.809579  | -4.209257 | -1.463066 |
| 52 | 1 | 0 | 0.248618  | -3.868835 | -1.557786 |
| 53 | 1 | 0 | 0.321017  | -2.092962 | -3.950362 |
| 54 | 1 | 0 | -0.480091 | -1.658902 | -2.634729 |
| 55 | 1 | 0 | 0.640135  | -0.692262 | -3.244520 |
| 56 | 1 | 0 | 0.441603  | 1.791207  | 4.227712  |
| 57 | 1 | 0 | -0.241343 | 1.664999  | 2.785841  |
| 58 | 1 | 0 | -0.029321 | 0.360086  | 3.687709  |
| 59 | 1 | 0 | 2.396863  | 2.925249  | 3.212008  |
| 60 | 1 | 0 | 3.234937  | 2.217634  | 2.046533  |
| 61 | 1 | 0 | 1.771992  | 2.791631  | 1.744849  |
| 62 | 1 | 0 | 2.716188  | 0.852975  | 4.623844  |
| 63 | 1 | 0 | 2.268312  | -0.568562 | 4.040588  |
| 64 | 1 | 0 | 3.537132  | 0.186000  | 3.422915  |
| 65 | 1 | 0 | -4.743405 | -0.415731 | 1.156635  |
| 66 | 1 | 0 | -4.454769 | 1.921986  | 0.407874  |
| 67 | 1 | 0 | -1.590193 | -4.425952 | 2.801846  |
| 68 | 1 | 0 | -1.782254 | -5.716096 | 0.887603  |
| 69 | 1 | 0 | -2.595038 | -4.791686 | -1.094335 |
| 70 | 1 | 0 | -1.807422 | -0.901298 | 3.003036  |
| 71 | 1 | 0 | -1.205411 | -1.807209 | 5.105101  |
| 72 | 1 | 0 | -1.478174 | -3.288140 | 4.563135  |
| 73 | 1 | 0 | -0.270323 | -2.426319 | 3.963517  |
| 74 | 1 | 0 | -3.501709 | -1.166520 | 4.666959  |
| 75 | 1 | 0 | -4.138820 | -1.273077 | 3.202480  |
| 76 | 1 | 0 | -3.879530 | -2.598749 | 4.060697  |
| 77 | 1 | 0 | -2.987869 | -1.360014 | -1.799993 |
| 78 | 1 | 0 | -3.395179 | -2.638251 | -3.741942 |

|     |   |   |           |           |           |
|-----|---|---|-----------|-----------|-----------|
| 79  | 1 | 0 | -2.008740 | -3.083584 | -3.078551 |
| 80  | 1 | 0 | -3.314134 | -3.989692 | -2.888506 |
| 81  | 1 | 0 | -5.239671 | -1.831242 | -2.422352 |
| 82  | 1 | 0 | -5.243782 | -3.104064 | -1.452286 |
| 83  | 1 | 0 | -5.122066 | -1.630925 | -0.838855 |
| 84  | 1 | 0 | -1.005102 | 5.611943  | 0.091688  |
| 85  | 1 | 0 | -0.436035 | 5.598894  | -2.152162 |
| 86  | 1 | 0 | -0.951237 | 3.763773  | -3.475150 |
| 87  | 1 | 0 | -2.373893 | 2.879260  | 1.967932  |
| 88  | 1 | 0 | -3.827644 | 4.652736  | 2.637443  |
| 89  | 1 | 0 | -3.398758 | 5.495369  | 1.346215  |
| 90  | 1 | 0 | -4.218996 | 4.131733  | 1.175694  |
| 91  | 1 | 0 | -1.520105 | 4.508570  | 3.458671  |
| 92  | 1 | 0 | -0.340864 | 3.973138  | 2.518648  |
| 93  | 1 | 0 | -1.013913 | 5.395366  | 2.226505  |
| 94  | 1 | 0 | -1.743155 | 0.562778  | -2.393976 |
| 95  | 1 | 0 | -1.559956 | 0.592822  | -4.742205 |
| 96  | 1 | 0 | -1.552843 | 2.193170  | -4.733251 |
| 97  | 1 | 0 | -0.336282 | 1.383887  | -4.080380 |
| 98  | 1 | 0 | -3.740098 | 0.510120  | -3.682064 |
| 99  | 1 | 0 | -3.998255 | 1.178519  | -2.250925 |
| 100 | 1 | 0 | -3.864610 | 2.100410  | -3.552170 |
| 101 | 1 | 0 | 0.359650  | -2.714658 | 0.328207  |
| 102 | 1 | 0 | 0.512897  | -1.387510 | 2.280482  |

---
